# Supplementary material for: Catalytic Dehydration of Fructose to 5-Hydroxymethylfurfural (HMF) in Low-Boiling Solvent Hexafluoroisopropanol (HFIP)
Source: PubMed Central journal article supplement (PMC6222439; doi:10.3390/molecules23081866), 2018-07-26
Supplement: molecules-23-01866-s001.pdf [file molecules-23-01866-s001.pdf]

Article

# Catalytic dehydration of fructose to 5-hydroxymethylfurfural (HMF) in low boiling solvent hexafluoroisopropanol (HFIP)

Sarah Tschirner, Eric Weingart, Linda Teevs and Ulf Prüße\*

Thünen Institute of Agricultural Technology, Bundesallee 47, 38116 Braunschweig;

\* Correspondence: ulf.pruesse@thuenen.de; Tel.: +49 531 596 4270

## Supplementary Materials:

**Table S1.** Properties of applied dry cationic ion-exchange resins. All data were provided by the manufacturers.

| catalyst name        | matrix                                  | acid site concentration [mmol/g] | T <sub>max</sub> [°C] | pore diameter [nm] | BET surface area [m <sup>2</sup> /g] | pore volume [cm <sup>3</sup> /g] |
|----------------------|-----------------------------------------|----------------------------------|-----------------------|--------------------|--------------------------------------|----------------------------------|
| Lewatit K2420        | styrene/DVB <sup>1</sup><br>macroporous | 5.4                              | 150                   | 53                 | 30                                   | 0.4                              |
| Lewatit K2431        | styrene/DVB <sup>1</sup><br>macroporous | 1.2 <sup>2</sup>                 | 130                   | 40                 | 25                                   | 0.35                             |
| Lewatit K2620        | styrene/DVB <sup>1</sup><br>macroporous | 5.2                              | 140                   | 41                 | 33                                   | 0.45                             |
| Amberlyst 15         | styrene/DVB <sup>1</sup><br>macroporous | 4.7                              | 120                   | 30                 | 53                                   | 0.4                              |
| Amberlyst 16         | styrene/DVB <sup>1</sup><br>macroporous | 4.7                              | 130                   | 25                 | 30                                   | 0.2                              |
| Amberlite IR-120 (H) | styrene/DVB <sup>1</sup><br>gel         | 4.5                              | 135                   | <0.5               | <0.1                                 | -                                |

<sup>1</sup>DVB = divinylbenzene. <sup>2</sup>wet form [mmol/L].

**Table S2.** Chemical and physical characteristics as well as safety parameters of 1,1,1,6,6,6-hexafluoroisopropanol (HFIP).

| boiling point [°C] | melting point [°C] | density [g/cm <sup>3</sup> ] | pK <sub>a</sub> | GWP (global warming potential) | Classification according to regulation (EC) No 1272/2008 |
|--------------------|--------------------|------------------------------|-----------------|--------------------------------|----------------------------------------------------------|
| 58                 | -4                 | 1.6                          | 9.3             | 200                            | GHS 05, GHS 07, GHS 08                                   |
